# Supplementary material for: Modeling of Growth and Organic Acid Kinetics and Evolution of the Protein Profile and Amino Acid Content during Lactiplantibacillus plantarum ITM21B Fermentation in Liquid Sourdough
Source: MDPI journal article supplement (doi:10.3390/foods11233942), 2022-12-06
Supplement: s1 [file s1]

**Table S1.** Growth rate datasets for the effects of temperature (**A**), pH (**B**) and water activity (**C**).

|          | <b>T (°C)</b> | <b><math>\mu_{\max}</math> (h<sup>-1</sup>)</b> |
|----------|---------------|-------------------------------------------------|
| <b>A</b> | 5.5           | 0.007                                           |
|          | 11            | 0.087                                           |
|          | 18            | 0.258                                           |
|          | 18            | 0.241                                           |
|          | 20            | 0.319                                           |
|          | 20            | 0.288                                           |
|          | 22            | 0.39                                            |
|          | 22            | 0.392                                           |
|          | 27            | 0.549                                           |
|          | 27            | 0.553                                           |
|          | 35            | 0.787                                           |
|          | 35            | 0.769                                           |
|          | 39            | 0.255                                           |
|          | 39            | 0.235                                           |
|          |               |                                                 |
|          | <b>pH</b>     | <b><math>\mu_{\max}</math> (h<sup>-1</sup>)</b> |
| <b>B</b> | 3.2           | 0.083                                           |
|          | 3.2           | 0.089                                           |
|          | 3.3           | 0.208                                           |
|          | 3.3           | 0.217                                           |
|          | 3.4           | 0.359                                           |
|          | 3.4           | 0.362                                           |
|          | 3.5           | 0.393                                           |
|          | 3.7           | 0.489                                           |
|          | 4.1           | 0.654                                           |
|          | 4.6           | 0.662                                           |
|          | 5.2           | 0.731                                           |
|          | 5.8           | 0.736                                           |
|          | 6.3           | 0.745                                           |
|          | 6.8           | 0.706                                           |
|          | 7.3           | 0.701                                           |
|          | 7.6           | 0.672                                           |
|          | 8             | 0.611                                           |
|          | 8.7           | 0.585                                           |
|          | 9.1           | 0.489                                           |

---

|   | $a_w$ | $\mu_{\max}$ (h <sup>-1</sup> ) |
|---|-------|---------------------------------|
| C | 0.996 | 0.786                           |
|   | 0.996 | 0.724                           |
|   | 0.992 | 0.674                           |
|   | 0.992 | 0.687                           |
|   | 0.989 | 0.638                           |
|   | 0.987 | 0.668                           |
|   | 0.98  | 0.479                           |
|   | 0.975 | 0.415                           |
|   | 0.975 | 0.402                           |
|   | 0.972 | 0.182                           |
|   | 0.97  | 0.189                           |
|   | 0.965 | 0.076                           |
|   | 0.965 | 0.06                            |
|   |       |                                 |

---

**Table S2.** Growth rate datasets for the effects of undissociated lactic acid [HA] at pH 4.7 (A) and 5.1 (B)

|          | pH  | [HA] (mM) | $\mu_{\max}$ (h <sup>-1</sup> ) |
|----------|-----|-----------|---------------------------------|
| <b>A</b> | 4.7 | 0         | 0.415                           |
|          | 4.7 | 5         | 0.442                           |
|          | 4.7 | 5         | 0.452                           |
|          | 4.7 | 15        | 0.483                           |
|          | 4.7 | 15        | 0.464                           |
|          | 4.7 | 30        | 0.358                           |
|          | 4.7 | 30        | 0.393                           |
|          | 4.7 | 40        | 0.321                           |
|          | 4.7 | 40        | 0.312                           |
|          | 4.7 | 50        | 0.261                           |
|          | 4.7 | 50        | 0.292                           |
|          | 4.7 | 60        | 0.227                           |
|          | 4.7 | 60        | 0.197                           |
|          | 4.7 | 70        | 0.216                           |
|          | 4.7 | 70        | 0.185                           |
|          | 4.7 | 80        | 0.163                           |
|          | 4.7 | 80        | 0.157                           |
|          | 4.7 | 100       | 0.061                           |
|          | 4.7 | 100       | 0.104                           |
|          | pH  | [HA] (mM) | $\mu_{\max}$ (h <sup>-1</sup> ) |
| <b>B</b> | 5.1 | 0         | 0.507                           |
|          | 5.1 | 0         | 0.458                           |
|          | 5.1 | 5         | 0.488                           |
|          | 5.1 | 5         | 0.603                           |
|          | 5.1 | 15        | 0.543                           |
|          | 5.1 | 15        | 0.571                           |
|          | 5.1 | 30        | 0.487                           |
|          | 5.1 | 30        | 0.438                           |
|          | 5.1 | 40        | 0.413                           |
|          | 5.1 | 40        | 0.428                           |
|          | 5.1 | 50        | 0.374                           |
|          | 5.1 | 50        | 0.403                           |
|          | 5.1 | 60        | 0.323                           |
|          | 5.1 | 60        | 0.39                            |
|          | 5.1 | 70        | 0.315                           |
|          | 5.1 | 70        | 0.367                           |
|          | 5.1 | 80        | 0.338                           |
|          | 5.1 | 100       | 0.245                           |
|          | 5.1 | 100       | 0.294                           |
